# Supplementary material for: Prostanoid-dependent spontaneous pain and PAR2-dependent mechanical allodynia following oral mucosal trauma: Involvement of TRPV1, TRPA1, and TRPV4
Source: PubMed Central journal article supplement — Mol Pain. 2017 Apr 20;13:1744806917704138. doi: 10.1177/1744806917704138 (PMC5407658; doi:10.1177/1744806917704138), 2017-04-20
Supplement: MPX704138_supplementary_material.pdf [file MPX704138_supplementary_material.pdf]

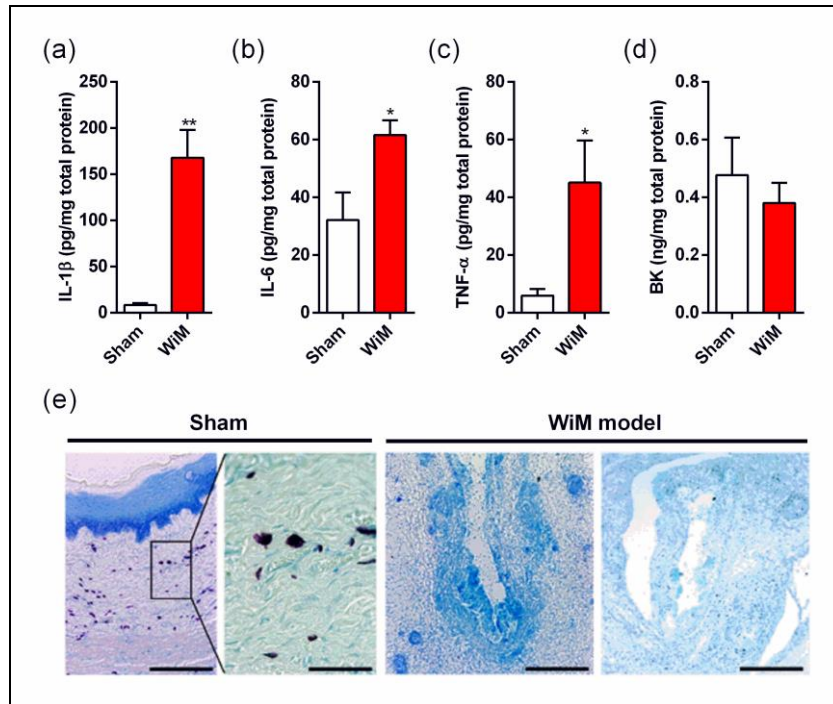

**Supplementary Figure 1.** Inflammatory mediators and mast cells in the traumatic mucositis of the wire-induced mucositis (WiM) model on day 1. (a–d) Interleukin-1 $\beta$  (IL-1 $\beta$ ), IL-6 and tumor necrosis factor- $\alpha$  (TNF- $\alpha$ ) and bradykinin (BK) levels in the oral mucosa of the sham and WiM on day 1 (each group, n=4) by ELISA. \* and \*\* indicate  $P < 0.05$  and  $0.01$ , respectively, compared with the sham; Student's  $t$  test. (e) Toluidine blue staining of the oral mucositis of the sham and the traumatic mucositis in the WiM model on day 1. Scale bar, 200  $\mu\text{m}$ . In the sham (n=4), there were abundant toluidine blue-stained mast cells in the healthy oral mucosa (microphotograph on the right side expanded from a box on the left side; Scale bar, 50  $\mu\text{m}$ ). However, no or little toluidine blue-stained cells were present in the traumatic mucositis in the WiM model (n=4).
